# Supplementary material for: Why Breeding Values Estimated Using Familial Data Should Not Be Used for Genome-Wide Association Studies
Source: PubMed Central journal article supplement (PMC3931567; doi:10.1534/g3.113.008706), 2013-12-20
Supplement: supp_g3.113.008706_008706SI.pdf [file supp_g3.113.008706_008706SI.pdf]

## Why breeding values estimated using familial data should not be used for Genome-Wide Association Studies

C. C. Ekine<sup>1,3</sup>, S.J. Rowe<sup>1,4</sup>, S.C. Bishop<sup>1</sup> and D.J. de Koning<sup>1,2</sup>

<sup>1</sup>The Roslin Institute and R(D)SVS, University of Edinburgh, Easter Bush, Midlothian EH25 9RG, Scotland, U.K.

<sup>2</sup>Department of Animal Breeding and Genetics, Swedish University of Agricultural Sciences, 750 07 Uppsala, Sweden.

<sup>3</sup>Present address: Livestock Gentec-AFNS, University of Alberta, 1400 College Plaza, 8215 – 112 Street, Edmonton, Alberta, T6G 2C8, Canada.

<sup>4</sup>Present address: AgResearch, Department of Reproduction and Genomics. Invermay Agricultural Centre, Private Bag 50034, Puddle Alley, Mosgiel 9053, New Zealand.

Correspondence: Dirk Jan de Koning  
Department of Animal Breeding and Genetics  
Swedish University of Agricultural Sciences  
Box 7023, 750 07 Uppsala, Sweden  
Phone: +46 18 672039  
[di.de-koning@slu.se](mailto:di.de-koning@slu.se)

**DOI: 10.1534/g3.113.008706**

**Table S1 Type 1 error and power using tabulated and empirical thresholds for simulations based on a commercial pig pedigree using 2 or 5 generations of pedigree information.**

The simulated QTL explains 1% of phenotypic variance.

| heritability          | Method of analysis |                 |                  |         |      |      |                  |      |      |                 |      |      |
|-----------------------|--------------------|-----------------|------------------|---------|------|------|------------------|------|------|-----------------|------|------|
|                       | MG <sup>1</sup>    |                 |                  | GRAMMAR |      |      | EBV <sup>2</sup> |      |      | IF <sup>3</sup> |      |      |
|                       | Tab <sup>4</sup>   | FP <sup>5</sup> | Emp <sup>6</sup> | Tab     | FP   | Emp  | Tab              | FP   | Emp  | Tab             | FP   | Emp  |
| 5-generation pedigree |                    |                 |                  |         |      |      |                  |      |      |                 |      |      |
| 30%                   | 0.80               | 0.05            | 0.81             | 0.70    | 0.02 | 0.81 | 0.79             | 0.42 | 0.42 | 0.80            | 0.11 | 0.67 |
| 40%                   | 0.79               | 0.05            | 0.80             | 0.66    | 0.02 | 0.80 | 0.78             | 0.40 | 0.34 | 0.80            | 0.17 | 0.59 |
| 50%                   | 0.80               | 0.05            | 0.80             | 0.68    | 0.02 | 0.80 | 0.75             | 0.36 | 0.33 | 0.79            | 0.18 | 0.56 |
| 60%                   | 0.80               | 0.06            | 0.78             | 0.66    | 0.02 | 0.78 | 0.77             | 0.37 | 0.33 | 0.79            | 0.23 | 0.53 |
| 80%                   | 0.83               | 0.04            | 0.84             | 0.70    | 0.01 | 0.84 | 0.73             | 0.31 | 0.37 | 0.75            | 0.25 | 0.45 |
| 2-generation pedigree |                    |                 |                  |         |      |      |                  |      |      |                 |      |      |
| 30%                   | 0.85               | 0.06            | 0.82             | 0.76    | 0.03 | 0.81 | 0.82             | 0.35 | 0.40 | 0.85            | 0.13 | 0.72 |
| 40%                   | 0.84               | 0.06            | 0.82             | 0.74    | 0.02 | 0.82 | 0.79             | 0.32 | 0.45 | 0.82            | 0.13 | 0.68 |
| 50%                   | 0.82               | 0.05            | 0.80             | 0.70    | 0.01 | 0.83 | 0.79             | 0.32 | 0.44 | 0.82            | 0.18 | 0.63 |
| 60%                   | 0.82               | 0.06            | 0.79             | 0.69    | 0.02 | 0.81 | 0.74             | 0.32 | 0.40 | 0.77            | 0.19 | 0.55 |
| 80%                   | 0.84               | 0.05            | 0.85             | 0.71    | 0.02 | 0.83 | 0.76             | 0.28 | 0.45 | 0.79            | 0.23 | 0.54 |

<sup>1</sup>MG: Measured Genotype. <sup>2</sup>GRAMMAR: Genome-wide Rapid Association using Mixed Model and Regression <sup>3</sup>EBV: Estimated Breeding Value. <sup>4</sup>IF: Ignoring Family. <sup>5</sup>Tab: Power using tabulated threshold. <sup>6</sup>Emp: Empirical power using empirical threshold derived from the unlinked SNP. <sup>7</sup>FP: False positive rate using tabulated threshold.

**Table S2 Tabulated (Tab) and empirical (Emp) power for different association analyses across a range of relative QTL effects and heritabilities ( $h^2$ ) in simulated human and pig pedigrees.**

| $h^2$ | QTL effect | Human            |                  |                      |      |                  |      |                 |      | Pig  |      |      |      |      |      |      |      |
|-------|------------|------------------|------------------|----------------------|------|------------------|------|-----------------|------|------|------|------|------|------|------|------|------|
|       |            | MG <sup>1</sup>  |                  | GRAMMAR <sup>2</sup> |      | EBV <sup>3</sup> |      | IF <sup>4</sup> |      | MG   |      | GRA  |      | EBV  |      | IF   |      |
|       |            | Tab <sup>5</sup> | Emp <sup>6</sup> | Tab                  | Emp  | Tab              | Emp  | Tab             | Emp  | Tab  | Emp  | Tab  | Emp  | Tab  | Emp  | Tab  | Emp  |
| 30%   | 0.5%       | 0.53             | 0.56             | 0.47                 | 0.55 | 0.63             | 0.49 | 0.57            | 0.57 | 0.48 | 0.49 | 0.32 | 0.47 | 0.70 | 0.10 | 0.55 | 0.21 |
|       | 1%         | 0.82             | 0.82             | 0.77                 | 0.81 | 0.86             | 0.69 | 0.84            | 0.82 | 0.78 | 0.78 | 0.65 | 0.77 | 0.75 | 0.21 | 0.74 | 0.47 |
|       | 2%         | 0.98             | 0.98             | 0.98                 | 0.98 | 0.98             | 0.95 | 0.99            | 0.98 | 0.98 | 0.98 | 0.90 | 0.98 | 0.86 | 0.28 | 0.92 | 0.65 |
|       | 3%         | 1.00             | 1.00             | 1.00                 | 1.00 | 1.00             | 0.99 | 1.00            | 1.00 | 1.00 | 1.00 | 0.98 | 1.00 | 0.91 | 0.44 | 0.98 | 0.89 |
| 40%   | 0.5%       | 0.57             | 0.59             | 0.50                 | 0.56 | 0.64             | 0.47 | 0.60            | 0.55 | 0.52 | 0.51 | 0.33 | 0.51 | 0.70 | 0.10 | 0.60 | 0.21 |
|       | 1%         | 0.83             | 0.85             | 0.77                 | 0.85 | 0.83             | 0.71 | 0.84            | 0.82 | 0.79 | 0.74 | 0.59 | 0.71 | 0.75 | 0.18 | 0.74 | 0.34 |
|       | 2%         | 0.98             | 0.97             | 0.97                 | 0.98 | 0.98             | 0.94 | 0.98            | 0.97 | 0.96 | 0.96 | 0.89 | 0.96 | 0.84 | 0.27 | 0.91 | 0.60 |
| 50%   | 0.5%       | 0.51             | 0.54             | 0.41                 | 0.52 | 0.57             | 0.39 | 0.54            | 0.45 | 0.50 | 0.52 | 0.28 | 0.48 | 0.67 | 0.09 | 0.56 | 0.16 |
|       | 1%         | 0.83             | 0.84             | 0.74                 | 0.83 | 0.82             | 0.72 | 0.84            | 0.79 | 0.76 | 0.78 | 0.58 | 0.76 | 0.72 | 0.18 | 0.70 | 0.30 |
|       | 2%         | 0.99             | 0.99             | 0.97                 | 0.99 | 0.98             | 0.94 | 0.98            | 0.97 | 1.00 | 1.00 | 0.90 | 0.97 | 0.86 | 0.31 | 0.87 | 0.56 |
|       | 3%         | 1.00             | 1.00             | 1.00                 | 1.00 | 1.00             | 1.00 | 1.00            | 1.00 | 1.00 | 1.00 | 0.98 | 0.99 | 0.88 | 0.37 | 0.94 | 0.98 |
| 60%   | 0.5%       | 0.51             | 0.47             | 0.39                 | 0.46 | 0.56             | 0.36 | 0.54            | 0.41 | 0.52 | 0.52 | 0.30 | 0.51 | 0.67 | 0.10 | 0.60 | 0.14 |
|       | 1%         | 0.82             | 0.81             | 0.72                 | 0.82 | 0.82             | 0.68 | 0.83            | 0.74 | 0.80 | 0.78 | 0.60 | 0.77 | 0.73 | 0.17 | 0.73 | 0.26 |
|       | 2%         | 0.99             | 0.98             | 0.97                 | 0.98 | 0.98             | 0.94 | 0.98            | 0.97 | 0.97 | 0.97 | 0.09 | 0.96 | 0.81 | 0.28 | 0.87 | 0.52 |
| 80%   | 0.5%       | 0.53             | 0.54             | 0.39                 | 0.54 | 0.56             | 0.41 | 0.55            | 0.46 | 0.58 | 0.60 | 0.33 | 0.60 | 0.65 | 0.11 | 0.62 | 0.14 |
|       | 1%         | 0.84             | 0.81             | 0.73                 | 0.80 | 0.81             | 0.69 | 0.82            | 0.69 | 0.82 | 0.82 | 0.65 | 0.80 | 0.70 | 0.20 | 0.69 | 0.27 |
|       | 2%         | 0.98             | 0.98             | 0.95                 | 0.95 | 0.96             | 0.92 | 0.97            | 0.95 | 0.98 | 0.98 | 0.92 | 0.98 | 0.82 | 0.29 | 0.85 | 0.41 |
|       | 3%         | 1.00             | 1.00             | 0.99                 | 1.00 | 0.99             | 0.98 | 1.00            | 0.99 | 1.00 | 1.00 | 0.98 | 1.00 | 0.90 | 0.42 | 0.91 | 0.57 |

<sup>1</sup>MG: Measured Genotype. <sup>2</sup>GRAMMAR: Genome-wide Rapid Association using Mixed Model and Regression <sup>3</sup>EBV: Estimated Breeding Value. <sup>4</sup>IF: Ignoring Family. <sup>5</sup>Tab: Power using tabulated threshold. <sup>6</sup>Emp: Empirical power using empirical threshold derived from the unlinked SNP.

### Files S1-S2

Available for download at <http://www.g3journal.org/lookup/suppl/doi:10.1534/g3.113.008706/-/DC1>

**File S1** Excel file with all the different pedigrees that were used for simulation

**File S2** An example of the script file that was used to run the genedrop simulation within MORGAN
