# Supplementary material for: Why Breeding Values Estimated Using Familial Data Should Not Be Used for Genome-Wide Association Studies
Source: PubMed Central journal article supplement (PMC3931567; doi:10.1534/g3.113.008706), 2013-12-20
Supplement: supp_g3.113.008706_TableS1.pdf [file supp_g3.113.008706_TableS1.pdf]

**Table S1 Type 1 error and power using tabulated and empirical thresholds for simulations based on a commercial pig pedigree using 2 or 5 generations of pedigree information.**

The simulated QTL explains 1% of phenotypic variance.

| heritability | Method of analysis    |                 |                  |         |      |      |                  |      |      |                 |      |      |
|--------------|-----------------------|-----------------|------------------|---------|------|------|------------------|------|------|-----------------|------|------|
|              | MG <sup>1</sup>       |                 |                  | GRAMMAR |      |      | EBV <sup>2</sup> |      |      | IF <sup>3</sup> |      |      |
|              | Tab <sup>4</sup>      | FP <sup>5</sup> | Emp <sup>6</sup> | Tab     | FP   | Emp  | Tab              | FP   | Emp  | Tab             | FP   | Emp  |
|              | 5-generation pedigree |                 |                  |         |      |      |                  |      |      |                 |      |      |
| 30%          | 0.80                  | 0.05            | 0.81             | 0.70    | 0.02 | 0.81 | 0.79             | 0.42 | 0.42 | 0.80            | 0.11 | 0.67 |
| 40%          | 0.79                  | 0.05            | 0.80             | 0.66    | 0.02 | 0.80 | 0.78             | 0.40 | 0.34 | 0.80            | 0.17 | 0.59 |
| 50%          | 0.80                  | 0.05            | 0.80             | 0.68    | 0.02 | 0.80 | 0.75             | 0.36 | 0.33 | 0.79            | 0.18 | 0.56 |
| 60%          | 0.80                  | 0.06            | 0.78             | 0.66    | 0.02 | 0.78 | 0.77             | 0.37 | 0.33 | 0.79            | 0.23 | 0.53 |
| 80%          | 0.83                  | 0.04            | 0.84             | 0.70    | 0.01 | 0.84 | 0.73             | 0.31 | 0.37 | 0.75            | 0.25 | 0.45 |
|              | 2-generation pedigree |                 |                  |         |      |      |                  |      |      |                 |      |      |
| 30%          | 0.85                  | 0.06            | 0.82             | 0.76    | 0.03 | 0.81 | 0.82             | 0.35 | 0.40 | 0.85            | 0.13 | 0.72 |
| 40%          | 0.84                  | 0.06            | 0.82             | 0.74    | 0.02 | 0.82 | 0.79             | 0.32 | 0.45 | 0.82            | 0.13 | 0.68 |
| 50%          | 0.82                  | 0.05            | 0.80             | 0.70    | 0.01 | 0.83 | 0.79             | 0.32 | 0.44 | 0.82            | 0.18 | 0.63 |
| 60%          | 0.82                  | 0.06            | 0.79             | 0.69    | 0.02 | 0.81 | 0.74             | 0.32 | 0.40 | 0.77            | 0.19 | 0.55 |
| 80%          | 0.84                  | 0.05            | 0.85             | 0.71    | 0.02 | 0.83 | 0.76             | 0.28 | 0.45 | 0.79            | 0.23 | 0.54 |

<sup>1</sup>MG: Measured Genotype. <sup>2</sup>GRAMMAR: Genome-wide Rapid Association using Mixed Model and Regression <sup>3</sup>EBV: Estimated Breeding Value. <sup>4</sup>IF: Ignoring Family. <sup>5</sup>Tab: Power using tabulated threshold. <sup>6</sup>Emp: Empirical power using empirical threshold derived from the unlinked SNP. <sup>7</sup>FP: False positive rate using tabulated threshold.
