# Supplementary material for: Why Breeding Values Estimated Using Familial Data Should Not Be Used for Genome-Wide Association Studies
Source: PubMed Central journal article supplement (PMC3931567; doi:10.1534/g3.113.008706), 2013-12-20
Supplement: supp_g3.113.008706_TableS2.pdf [file supp_g3.113.008706_TableS2.pdf]

**Table S2 Tabulated (Tab) and empirical (Emp) power for different association analyses across a range of relative QTL effects and heritabilities ( $h^2$ ) in simulated human and pig pedigrees.**

| $h^2$ | QTL effect | Human            |                  |                      |      |                  |      |                 |      | Pig  |      |      |      |      |      |      |      |
|-------|------------|------------------|------------------|----------------------|------|------------------|------|-----------------|------|------|------|------|------|------|------|------|------|
|       |            | MG <sup>1</sup>  |                  | GRAMMAR <sup>2</sup> |      | EBV <sup>3</sup> |      | IF <sup>4</sup> |      | MG   |      | GRA  |      | EBV  |      | IF   |      |
|       |            | Tab <sup>5</sup> | Emp <sup>6</sup> | Tab                  | Emp  | Tab              | Emp  | Tab             | Emp  | Tab  | Emp  | Tab  | Emp  | Tab  | Emp  | Tab  | Emp  |
| 30%   | 0.5%       | 0.53             | 0.56             | 0.47                 | 0.55 | 0.63             | 0.49 | 0.57            | 0.57 | 0.48 | 0.49 | 0.32 | 0.47 | 0.70 | 0.10 | 0.55 | 0.21 |
|       | 1%         | 0.82             | 0.82             | 0.77                 | 0.81 | 0.86             | 0.69 | 0.84            | 0.82 | 0.78 | 0.78 | 0.65 | 0.77 | 0.75 | 0.21 | 0.74 | 0.47 |
|       | 2%         | 0.98             | 0.98             | 0.98                 | 0.98 | 0.98             | 0.95 | 0.99            | 0.98 | 0.98 | 0.98 | 0.90 | 0.98 | 0.86 | 0.28 | 0.92 | 0.65 |
|       | 3%         | 1.00             | 1.00             | 1.00                 | 1.00 | 1.00             | 0.99 | 1.00            | 1.00 | 1.00 | 1.00 | 0.98 | 1.00 | 0.91 | 0.44 | 0.98 | 0.89 |
| 40%   | 0.5%       | 0.57             | 0.59             | 0.50                 | 0.56 | 0.64             | 0.47 | 0.60            | 0.55 | 0.52 | 0.51 | 0.33 | 0.51 | 0.70 | 0.10 | 0.60 | 0.21 |
|       | 1%         | 0.83             | 0.85             | 0.77                 | 0.85 | 0.83             | 0.71 | 0.84            | 0.82 | 0.79 | 0.74 | 0.59 | 0.71 | 0.75 | 0.18 | 0.74 | 0.34 |
|       | 2%         | 0.98             | 0.97             | 0.97                 | 0.98 | 0.98             | 0.94 | 0.98            | 0.97 | 0.96 | 0.96 | 0.89 | 0.96 | 0.84 | 0.27 | 0.91 | 0.60 |
| 50%   | 0.5%       | 0.51             | 0.54             | 0.41                 | 0.52 | 0.57             | 0.39 | 0.54            | 0.45 | 0.50 | 0.52 | 0.28 | 0.48 | 0.67 | 0.09 | 0.56 | 0.16 |
|       | 1%         | 0.83             | 0.84             | 0.74                 | 0.83 | 0.82             | 0.72 | 0.84            | 0.79 | 0.76 | 0.78 | 0.58 | 0.76 | 0.72 | 0.18 | 0.70 | 0.30 |
|       | 2%         | 0.99             | 0.99             | 0.97                 | 0.99 | 0.98             | 0.94 | 0.98            | 0.97 | 1.00 | 1.00 | 0.90 | 0.97 | 0.86 | 0.31 | 0.87 | 0.56 |
|       | 3%         | 1.00             | 1.00             | 1.00                 | 1.00 | 1.00             | 1.00 | 1.00            | 1.00 | 1.00 | 1.00 | 0.98 | 0.99 | 0.88 | 0.37 | 0.94 | 0.98 |
| 60%   | 0.5%       | 0.51             | 0.47             | 0.39                 | 0.46 | 0.56             | 0.36 | 0.54            | 0.41 | 0.52 | 0.52 | 0.30 | 0.51 | 0.67 | 0.10 | 0.60 | 0.14 |
|       | 1%         | 0.82             | 0.81             | 0.72                 | 0.82 | 0.82             | 0.68 | 0.83            | 0.74 | 0.80 | 0.78 | 0.60 | 0.77 | 0.73 | 0.17 | 0.73 | 0.26 |
|       | 2%         | 0.99             | 0.98             | 0.97                 | 0.98 | 0.98             | 0.94 | 0.98            | 0.97 | 0.97 | 0.97 | 0.09 | 0.96 | 0.81 | 0.28 | 0.87 | 0.52 |
| 80%   | 0.5%       | 0.53             | 0.54             | 0.39                 | 0.54 | 0.56             | 0.41 | 0.55            | 0.46 | 0.58 | 0.60 | 0.33 | 0.60 | 0.65 | 0.11 | 0.62 | 0.14 |
|       | 1%         | 0.84             | 0.81             | 0.73                 | 0.80 | 0.81             | 0.69 | 0.82            | 0.69 | 0.82 | 0.82 | 0.65 | 0.80 | 0.70 | 0.20 | 0.69 | 0.27 |
|       | 2%         | 0.98             | 0.98             | 0.95                 | 0.95 | 0.96             | 0.92 | 0.97            | 0.95 | 0.98 | 0.98 | 0.92 | 0.98 | 0.82 | 0.29 | 0.85 | 0.41 |
|       | 3%         | 1.00             | 1.00             | 0.99                 | 1.00 | 0.99             | 0.98 | 1.00            | 0.99 | 1.00 | 1.00 | 0.98 | 1.00 | 0.90 | 0.42 | 0.91 | 0.57 |

<sup>1</sup>MG: Measured Genotype. <sup>2</sup>GRAMMAR: Genome-wide Rapid Association using Mixed Model and Regression <sup>3</sup>EBV: Estimated Breeding Value. <sup>4</sup>IF: Ignoring Family. <sup>5</sup>Tab: Power using tabulated threshold. <sup>6</sup>Emp: Empirical power using empirical threshold derived from the unlinked SNP.
